# Supplementary material
Source: Springer Nature journal article supplement (https://www.springermedizin.de/resource/supplementary/12936_2006_249_MOESM3_ESM.pdf/9547300)

A)

4 5 6 2 3 2 3 2 2 7 7 1 1 M

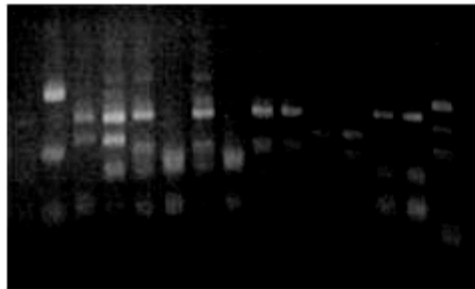

B)

2 1 3 2 2 4 5 M

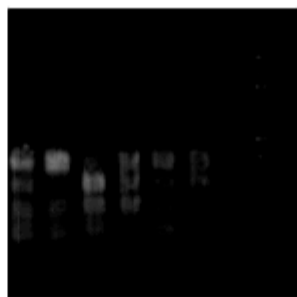

Supplement: MOESM3 [file 9547300]
